# Supplementary material
Source: PubMed Central journal article supplement (PMC4213156)
Supplement: supp_tpc.114.128736_tpc128736_Supplemental2.pdf [file supp_tpc.114.128736_tpc128736_Supplemental2.pdf]

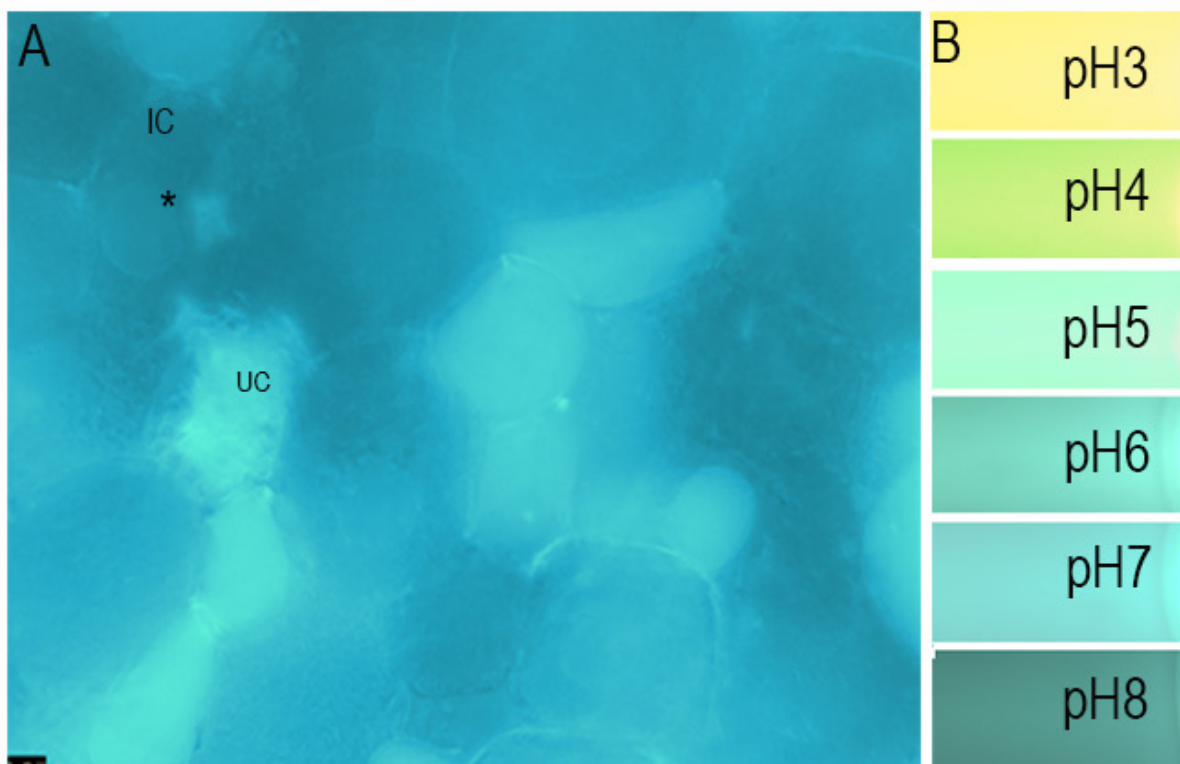

Supplemental Figure 1. Vacuoles in uninfected cells emit fluorescence corresponding to pH 5-5.5 whereas vacuoles in infected cells emit fluorescence corresponding to pH 7-7.5. Uninfected cells are distinguished from infected ones by their smaller size; the vacuoles of uninfected cells occupy near the whole area of the cell. Panel B shows the calibration of fluorescence of lysosensor Yellow/Blue at pH 3 to 8. IC, infected cell, (\*) vacuole; UC, uninfected cell, bar:25 $\mu$ m. For analysis used a Leica DM 5500 Flu microscope with the filter cube A (DAPI). Bar:75  $\mu$ m

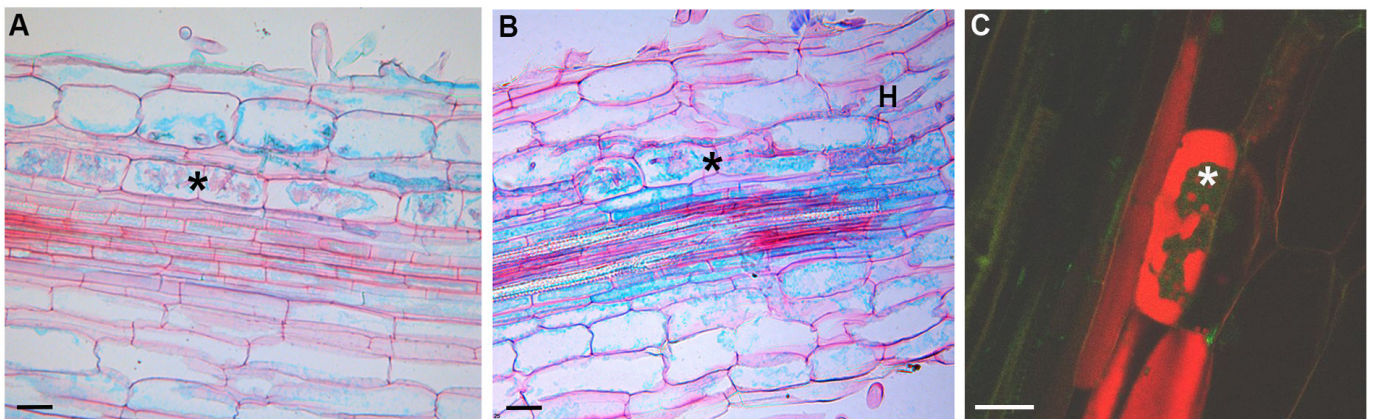

Supplemental Figure 2. The expression pattern of ProVPS11:GUS (A) and ProVPS39:GUS (B) in transgenic roots inoculated by *G. intraradices* shows that both VPS11 and VPS39 are expressed in the root cells which contain arbuscules. (C): Neutral Red staining to determine vacuolar pH indicates that the vacuole of the cell, containing the arbuscule (asterisk), retains acidic pH (C). H-hyphae, (\*) – arbuscules. Bars:(A),(B):25 $\mu$ m, (C): 20  $\mu$ m.

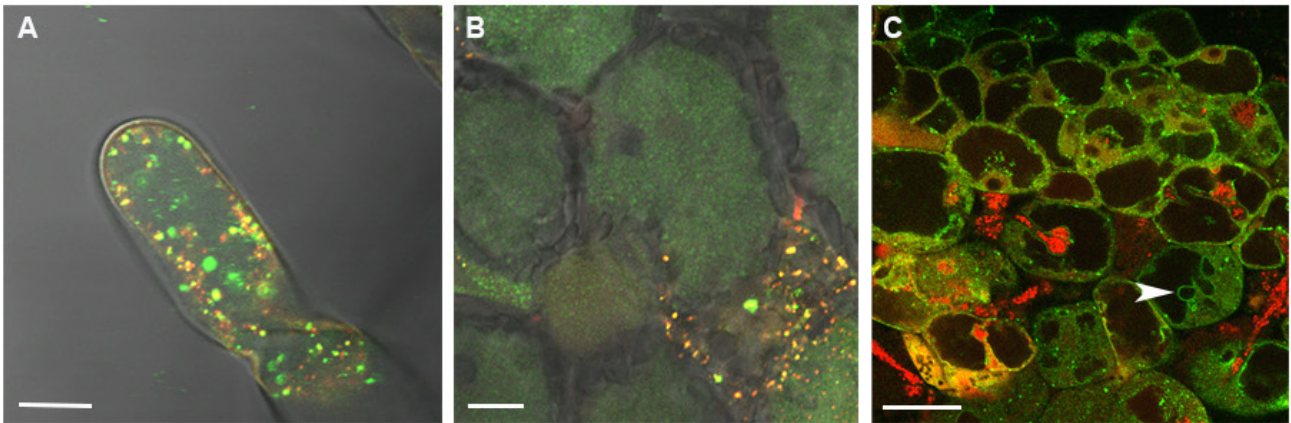

Supplemental Figure 3. Co-localization of endosome/vacuole molecular marker VTI11 with VPS proteins in ProVPS11:GFP-VPS11(A) and ProVPS39:GFP-VPS39 (B) transgenic cells. Co-localization shows that VPS proteins are located on the same structures- endosomes/young vacuoles- as a molecular marker VTI11. Tonoplast localization of GFP-VPS11 in ProUBQ3:GFP-VPS11 transgenic nodule (C). Arrow: tonoplast labelled by GFP. Bars: (A), (B): 10  $\mu$ m, (C): 20 $\mu$ m

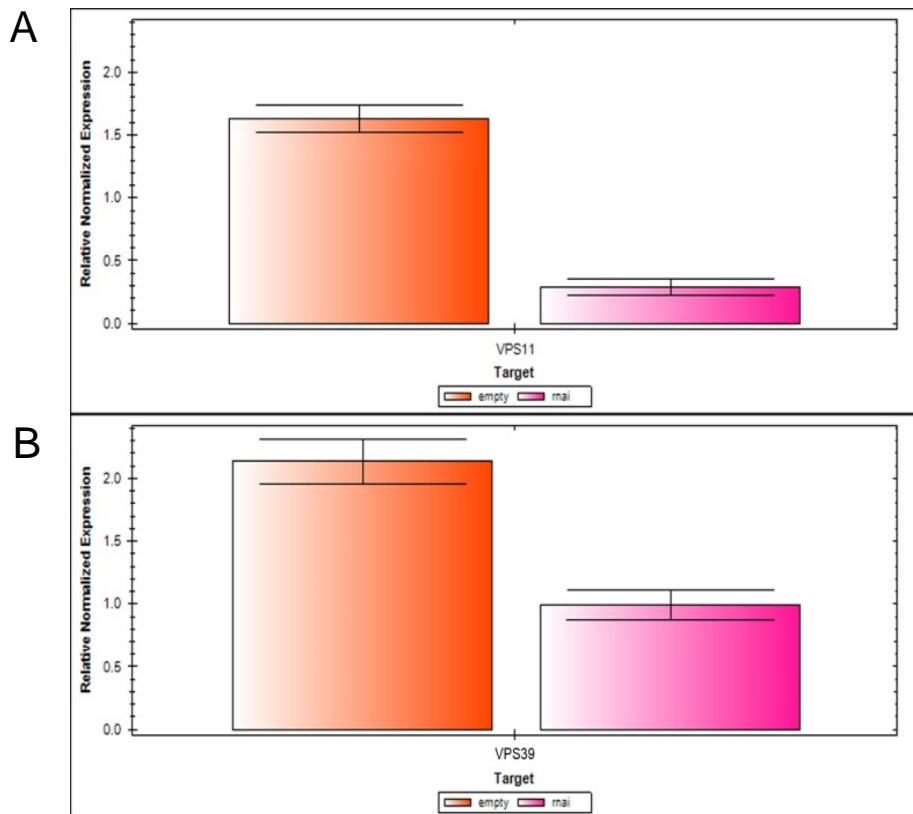

**Supplemental Figure 4.** The level of gene silencing of VPS11 **(A)** and VPS39 **(B)** in 14 dpi nodules elicited on *ProE12:RNAi-VPS11* and *ProE12:RNAi-VPS39* transgenic roots ( $P < 0.05$ ).

A

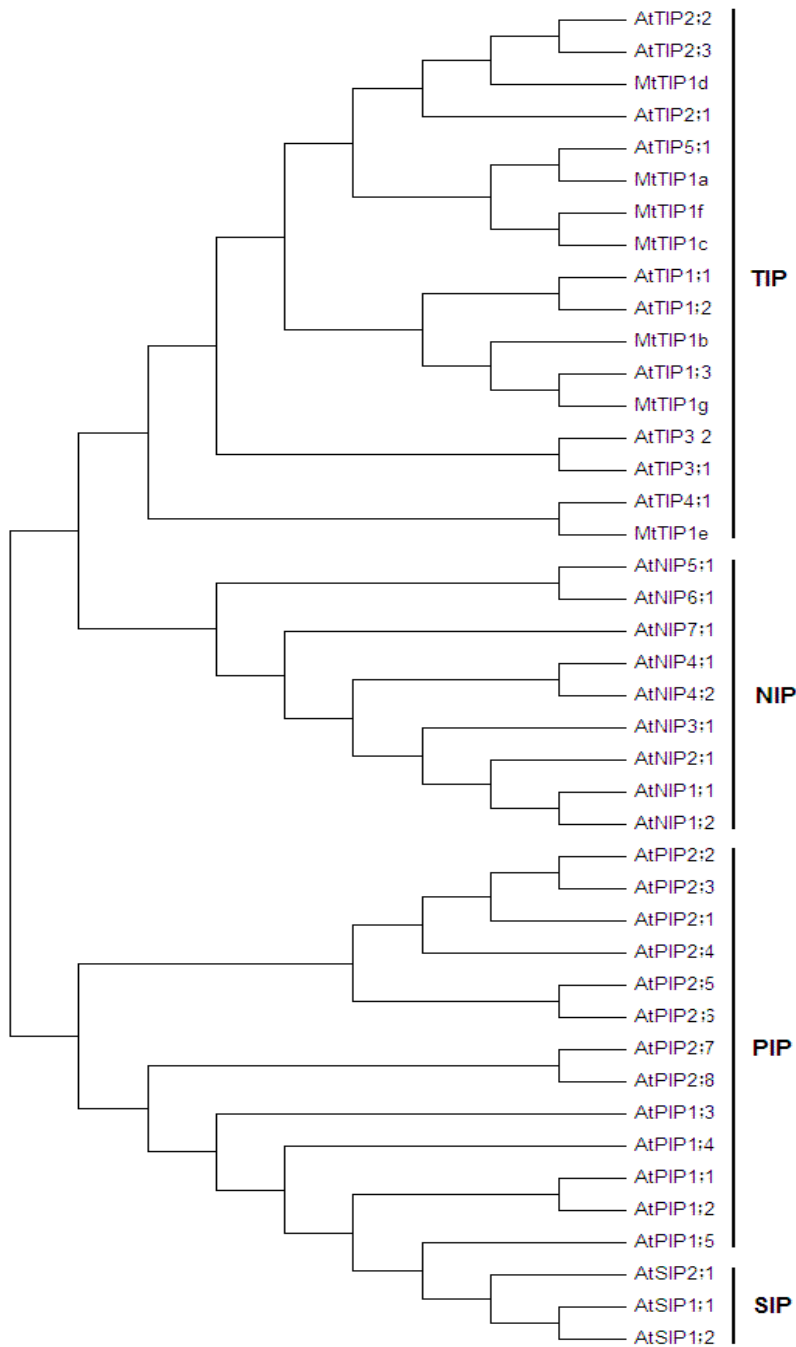

B

|           |                                                               |    |
|-----------|---------------------------------------------------------------|----|
| At-TIP1;2 | MPTRNIAIGGVQEEVYHPNALRAALAEFISTLIFVFAGSGSGIAFNKITDNGATTPSGLV  | 60 |
| Os-γTIP   | MPIRNIAVG-SHQEVYHPGALKAALAEFISTLIFVFAGQGSGMAF SKLTGGGATTPAGLI | 59 |
| Mt-TIP1b  | MPIRNIAVG-TPQEATHPDTLKAGLAEFISTFIFVFAGSGSGIAYNKLTNDGAATPAGLI  | 59 |
| Mt-TIP1g  | MPISRIAIG-NPSEFGKADALKAALAEFISMLIFVFAGEGSGMAYNKLTNNGAATPAGLV  | 59 |
| Gh-γTIP1  | MPISRIAIG-SPAEAGQADALKAALAEFISVLI FVFAGEGSGMAFNKLTDDGSSTPAGLV | 59 |
| Zm-TIP1-2 | MPVSRIVG-APGELSHPDTAKAAVAEFISTLIFVFAGSGSGMAF SKLTDDGAATPAGLI  | 59 |
| Mt-TIP1e  | --MAKIALG-TTREATQPDCIQALIVEFIATFLFVFAGVGSAMTADKLSGD-----      | 48 |

```

Mt-TIP1c      -MA-GIAFG-RLDDSFSGSIKAYIAEFISTLLFVVFAGVGSIAIAYGKLTSDAALDPAGLL 57
Mt-TIP1f      -MGRGIAFG-RFDDSFVSSIRAYVAEFISTLIFVVFAGVGSIAIAYAKLTSGAALDPAGLV 58
Mt-TIP1d      --MVKIGFG-TFDDSFSAASLKAYLSEFIATLIFVVFAGVGSIAIAYNDLTSDAALDPAGLV 57
Mt-TIP1a      -----MTG-----KLMPDASLNPTSLV 17
                AAA
At-TIP1;2     AAALAHAFGLFVAVSVGANISGGHVNPVTFGVLLGGNITLLRGILYWIAQLLGSVAACF 120
Os-γTIP       AAAVAHAFALFVAVSVGANISGGHVNPVTFGAFVGGNITLFRGLLYWIAQLLGSVACF 119
Mt-TIP1b      SASIAHAFALFVAVSVGANISGGHVNPVTFGAFVGGNITLLRGIVYIIAQLLGSIVASA 119
Mt-TIP1g      AASLSHAFALFVAVSVGANISGGHVNPVTFGAFVGGNITLIRGLLYWIAQLLGSVACL 119
Gh-γTIP1      AAAHALALFVAVSIGANISGGHVNPVTFGAFVGGNITLVRSLYWIAQLLGSVACF 119
Zm-TIP1-2     AASLAHALALFVAVSVGANISGGHVNPVTFGAFVGGNITLLKALVYVWVQQLLGSVACL 119
Mt-TIP1e      -----ALVGLFFVGHITIVRSILYWIDQLIASAAACY 80
Mt-TIP1c      AVAVCHGFALFVAVAVGANISGGHVNPVTFGLAVGGQITILTGFYWIAQLLGSIVACF 117
Mt-TIP1f      AVAVCHGFALFVAVSVGANISGGHVNPVTFGLAIGGQITILTGFYWIAQLLGSIVACF 118
Mt-TIP1d      AVAVAHAFALFVGVAAIANISGGHLNPAVTFGLAIGGNITILTGLFYWIAQLLGSIVASL 117
Mt-TIP1a      VGIASAFALSSVLYIAWDISGGHVNPVTFAMA VGGHISVPTALFYWVWVQQLIASVIACL 77

At-TIP1;2     LLSFATGGEPFPAFGLSAGVGSNLNALVFEIVMTFGLVYTVYATAVDPKNGSLGTIAPIAI 180
Os-γTIP       LLRFSTGGLATGTFGLTG-VSVWEALVLEIVMTFGLVYTVYATAVDPKNGSLGTIAPIAI 178
Mt-TIP1b      LLVFTAS-SVPFGLSEGVGVPALVLEIVMTFGLVYTVYATAVDPKNGNIGI IAPIAI 178
Mt-TIP1g      LLKIATGGLETSAFSLSSGVGATNALVFEIVMTFGLVYTVYATAVDPKNGSLGTIAPIAI 179
Gh-γTIP1      LLKFSTGGMTTSAFSLSSGVGAMNAVVEIVMTFGLVYTVYATAVDPKNGNIGI IAPIAI 179
Zm-TIP1-2     LLKIATGGALGAFSLSAGVGMNAVVEIVMTFGLVYTVYATAVDPKNGDLGVIAPIAI 179
Mt-TIP1e      LLHFLSGGLTTPAHTLASGVVVEIVLTFLLFTYATMVDPKKAGLAGLPTLV 140
Mt-TIP1c      LLQFVTGGLETPIHSAEVEVPIGGVVTEI IITFGLVYTVYATAADPKKGSIGTIAPIAI 177
Mt-TIP1f      LLKYATGGTIPIHSAEVEVPIGGVVTEI IITFGLVYTVYATAADPKKGSIGTIAPIAI 178
Mt-TIP1d      LLNVVT-AKSVPTHGVAAGLNPIAGLVFEI IITFGLVYTVYATAADPKKGSIGTIAPIAI 176
Mt-TIP1a      FLKIVVGMHVPTYSAEEMTGFGASILEGILTFVLVYTYA-ARDTRRGQVSSSTGLTVI 136

                AAA
At-TIP1;2     GFIVGANILAGGAFSGASMNPAVAVVSWTWNHVVYWGAPLIGGGLAGVIYDFVFI 240
Os-γTIP       GFIVGANILVGGAFDASMNPAVAVVSWTWNHVVYWGAPLIGGGLAGVIYEVLFVI 238
Mt-TIP1b      GFIVGANILVGGAFDASMNPAVAVVSWTWNHVVYWGAPLIGGGLAGVIYEVLFVI 238
Mt-TIP1g      GFIVGANILAGGAFDASMNPAVAVVSWTWNHVVYWGAPLIGGGLAGVIYEVLFVI 239
Gh-γTIP1      GFIVGANILAGGAFDASMNPAVAVVSWTWNHVVYWGAPLIGGGLAGVIYEVLFVI 239
Zm-TIP1-2     GFIVGANILAGGAFDASMNPAVAVVSWTWNHVVYWGAPLIGGGLAGVIYEVLFVI 239
Mt-TIP1e      GFVVGANILAGGAFSAASMNPARSFGPALVSGNWTDHVVYVWGAPLIGGGLAGVIYENFFI 200
Mt-TIP1c      GFIVGANILAGGAFSGGSMNPARSFGPAVVSNGFHDNWIYWGAPLIGGGLAGLIYGNVFM 237
Mt-TIP1f      GLIVGANILAGGAFSGGSMNPARSFGPAVLSGDYHNNWIYVWGAPLIGGGLAGVIYSYVFM 238
Mt-TIP1d      GFVVGANILAGGAFSGGSMNPARSFGPAVVSNGFADNWIYVWGAPLIGGGLAGLIYGDVFI 236
Mt-TIP1a      GLIAGASVLAAGPFSGGSINPACAFGSAS IAGTFRNQAVYVWGAPLIGAVVAGLLYDNVLF 196

At-TIP1;2     DENAHEQLP--TTDY--- 253
Os-γTIP       SH-THEQLP--TTDY--- 250
Mt-TIP1b      NS-THEQLP--TTDY--- 250
Mt-TIP1g      TPSSYEQLP--VTDY--- 252
Gh-γTIP1      APSTYEEVP--SADF--- 252
Zm-TIP1-2     GQRPHQQLPTTAADY--- 254
Mt-TIP1e      NR-DHVPLAVDEESY--- 214
Mt-TIP1c      HT-EHAPLS---SDF--- 248
Mt-TIP1f      PS-DHVPLA---SDF--- 249
Mt-TIP1d      GS-YTPAPA---SEF--- 247
Mt-TIP1a      PSQNSDCIRGVSDGTVRV 214
    
```

C

| Gene name | Corresponding gene locus |
|-----------|--------------------------|
| Mt-TIP1a  | Medtr2g060360            |
| Mt-TIP1b  | AJ251652.1               |
| Mt-TIP1c  | Medtr8g013680            |
| Mt-TIP1d  | Medtr5g012810            |
| Mt-TIP1e  | Medtr1g006490            |
| Mt-TIP1f  | Medtr2g101370            |
| Mt-TIP1g  | Medtr4g063090            |
| At-TIP1;1 | AT2G36830                |
| At-TIP1;2 | AT3G26520                |
| At-TIP1;3 | AT4G01470                |

|           |           |
|-----------|-----------|
| At-TIP2;1 | AT3G16240 |
| At-TIP2;2 | AT4G17340 |
| At-TIP2;3 | AT5G47450 |
| At-TIP3;1 | AT1G73190 |
| At-TIP3;2 | AT1G17810 |
| At-TIP4;1 | AT2G25810 |
| At-TIP5;1 | AT3G47440 |
| At-PIP1;1 | At3g61430 |
| At-PIP1;2 | At2g45960 |
| At-PIP1;3 | At1g01620 |
| At-PIP1;4 | At4g00430 |
| At-PIP1;5 | At4g23400 |
| At-PIP2;1 | At3g53420 |
| At-PIP2;2 | At2g37170 |
| At-PIP2;3 | At2g37180 |
| At-PIP2;4 | At5g60660 |
| At-PIP2;5 | At3g54820 |
| At-PIP2;6 | At2g39010 |
| At-PIP2;7 | At4g35100 |
| At-PIP2;8 | At2g16850 |
| At-NIP1;1 | At4g19030 |
| At-NIP1;2 | At4g18910 |
| At-NIP2;1 | At2g34390 |
| At-NIP3;1 | At1g31885 |
| At-NIP4;1 | At5g37810 |
| At-NIP4;2 | At5g37820 |
| At-NIP5;1 | At4g10380 |
| At-NIP6;1 | At1g80760 |
| At-NIP7;1 | At3g06100 |
| At-SIP1;1 | At3g04090 |
| At-SIP1;2 | At5g18290 |
| At-SIP2;1 | At3g56950 |

## D

| Gene name         | Corresponding gene locus | References               |
|-------------------|--------------------------|--------------------------|
| At-TIP1;2         | AT3G26520                | Bourguignon et al., 2007 |
| Gh- $\gamma$ TIP1 | EF470294                 | Zhang et al., 2008       |
| Os- $\gamma$ TIP  | RICYK333                 | Uchimiya et al., 1994    |
| Zm-TIP1-2         | AF326500                 | Jung et al., 2001        |

**Supplemental Figure 5.** (A) Phylogenetic comparison of transporters from *M. truncatula* and *A. thaliana*. Classification and naming of *A. thaliana* MIPs members as in Johanson et al. (2001). Phylogenetic analyses (bootstrap values of 500 replicates) were conducted using MEGA version 5 (Tamura et al., 2011). (B) ClastalW alignment of predicted amino acid sequence of *M. truncatula* aquaporins with another well studied water transporters. Transmembrane domains are shown with a line below the alignment; triangles indicate the NPA selectivity filter. (C) Accession numbers of gene sequences used in TIPs phylogenetic analysis. (D) Gene sequences used for multiple alignments of amino acid sequences



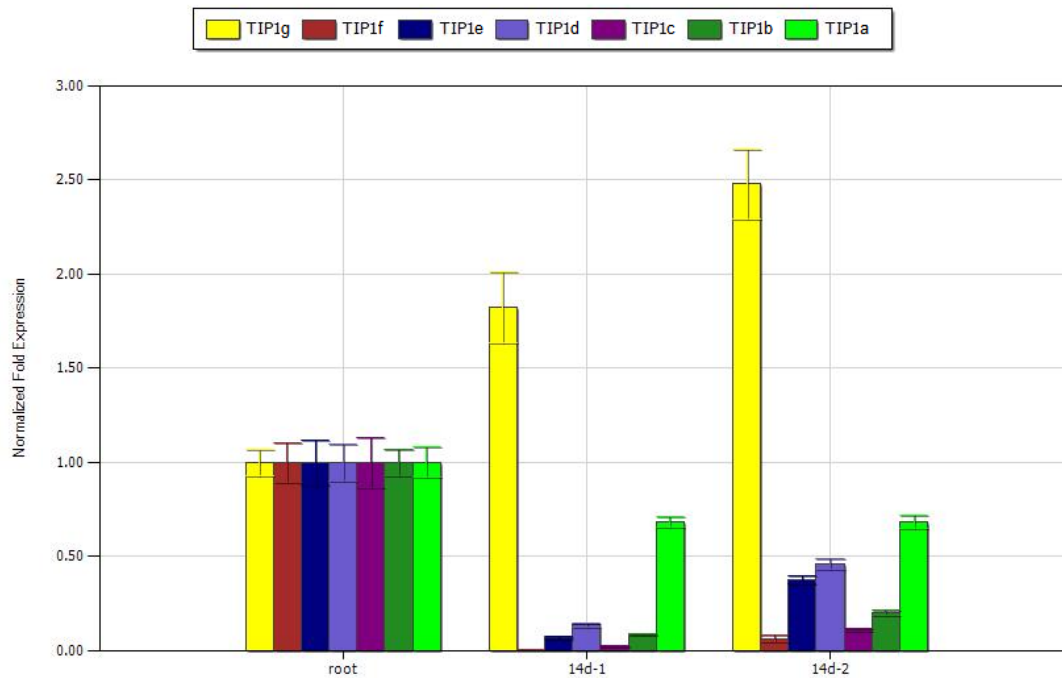

**Supplemental Figure 6.** Expression profile of *M. truncatula* TIP genes in roots and different zones of 14 day old nodules (14-1 – meristem and infection zone, 14-2 – fixation zone). Expression level was determined by qRT-PCR and normalized against transcription level of reference gene *M. truncatula* UBQ10.

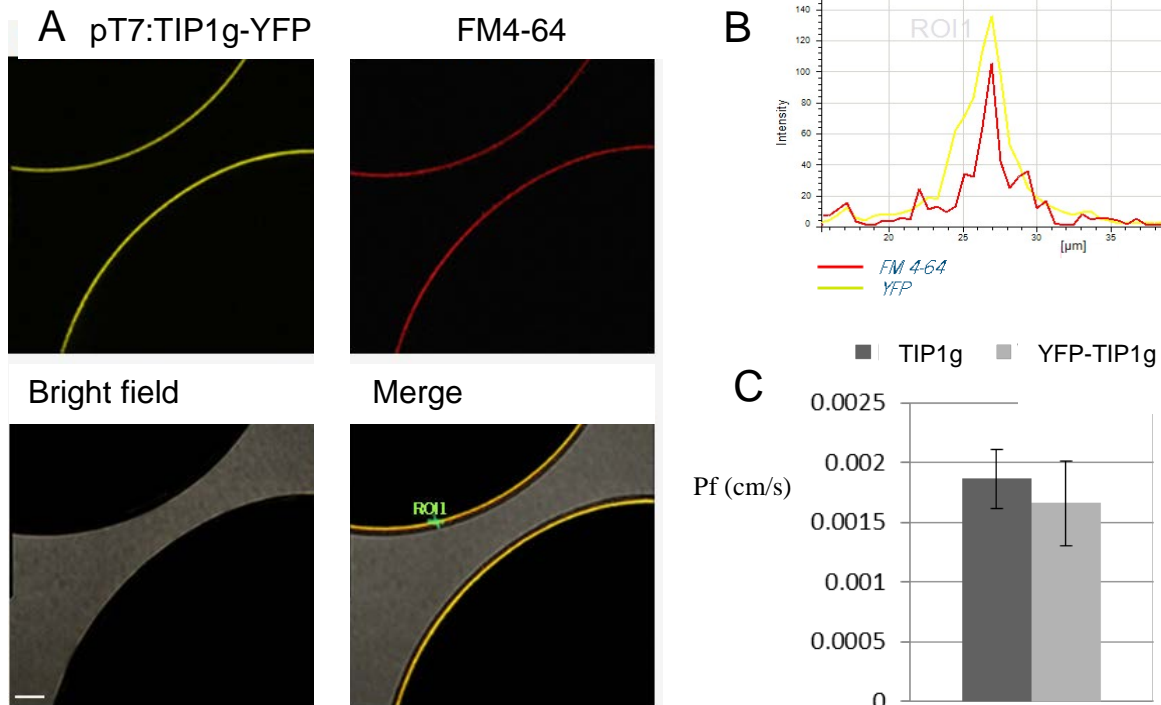

**Supplemental Figure 7.** YFP-TIP1g localizes on plasma membrane of injected oocytes. **(A)** Confocal image of expressing YFP-TIP1g oocytes. Plasma membrane is counterstained with FM4-64. **(B)** Signal overlapping in region of interest 1 (ROI1). **(C)** Water permeability coefficient values for oocytes injected with cRNA encoding TIP1g and YFP-TIP1g. Bar :0.5  $\mu\text{m}$



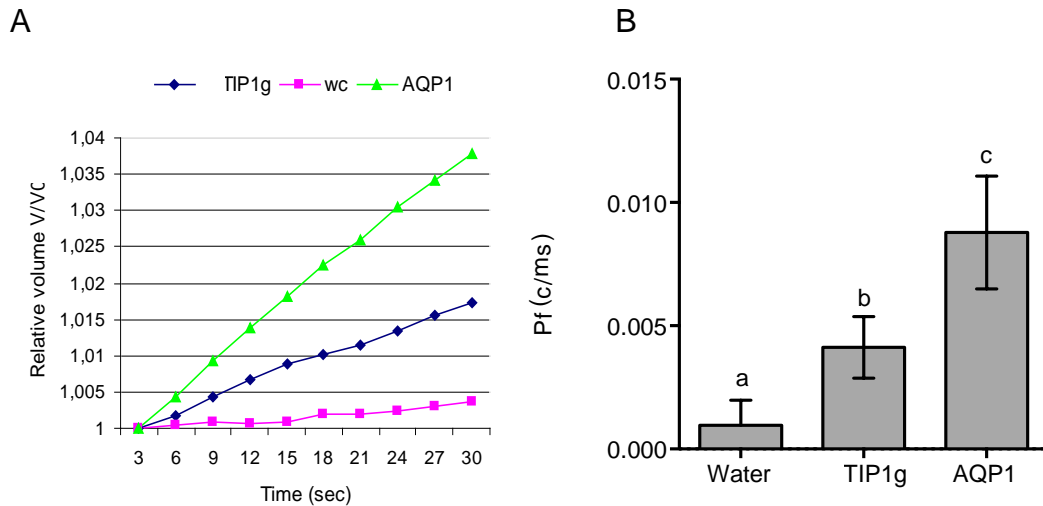

**Supplemental Figure 8.** Water-channel activity of TIP1g.

**(A)** The relative volume of oocytes injected with cRNA encoding TIP1g, human AQP1 or water following exposure to hypotonic media. The rate of oocytes swelling is plotted as  $V/V_0$  versus time, where  $V$  is a volume at the certain time point and  $V_0$  is the initial volume.

**(B)** Water permeability coefficient values for oocytes injected with cRNA encoding TIP1g, AQP1 or water. The difference was significant, that show that TIP1g is a functional water transporter.

| Tukey's multiple comparisons test | Mean Diff. | 95% CI of diff.        | Significant? | Summary | Adjusted P Value |
|-----------------------------------|------------|------------------------|--------------|---------|------------------|
| TIP1g vs. Water                   | 0.003166   | 0.001308 to 0.005025   | Yes          | ***     | 0.0006           |
| TIP1g vs. AQP1                    | -0.004654  | -0.006185 to -0.003122 | Yes          | ****    | < 0.0001         |
| Water vs. AQP1                    | -0.007820  | -0.009742 to -0.005897 | Yes          | ****    | < 0.0001         |

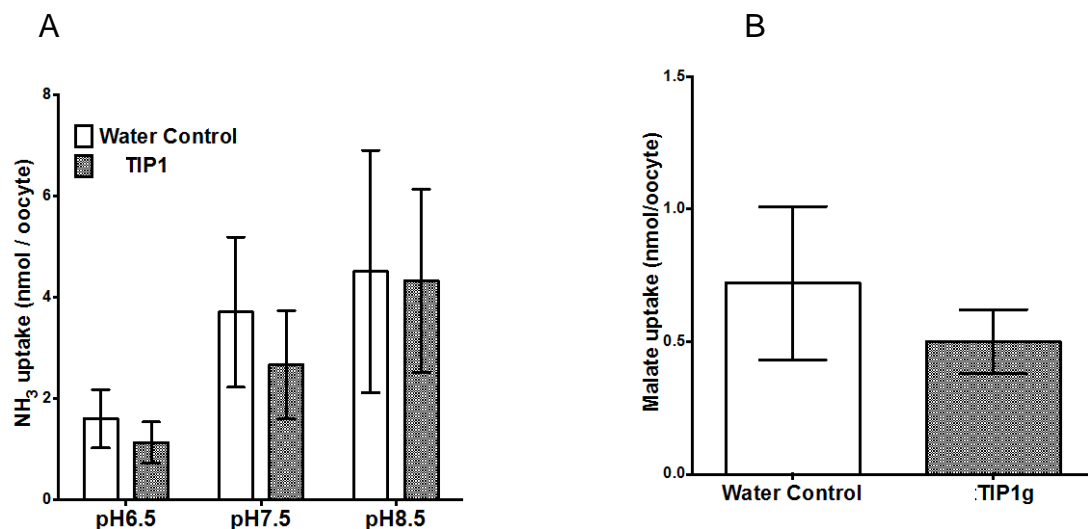

**Supplemental Figure 9.** TIP1g does not transport ammonia and malate.

**(A)** NH<sub>3</sub> flux experiment. <sup>15</sup>N content of TIP1g injected oocytes were same with water control in all pH tested. This result suggests that TIP1g is not a NH<sub>3</sub> transporter.

**(B)** Malate flux experiment. TIP1g injected oocytes in comparison with water control, show no significant differences, TIP1g does not transport malate.

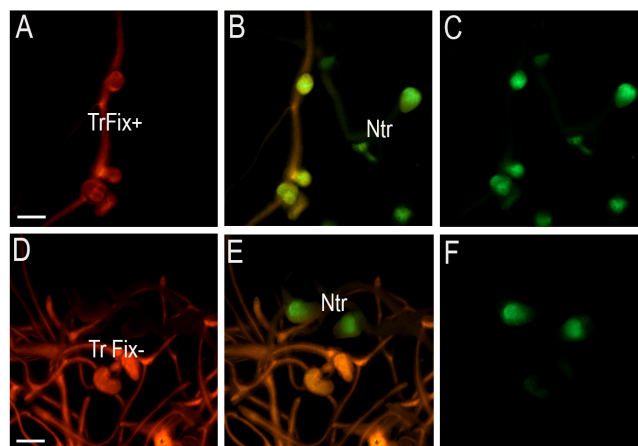

Supplemental Figure 10. The induction of the rhizobial *nifH* gene, detectable due to GFP fluorescence, permits discrimination between Fix+ and Fix- nodules on ProL-B:RNAi-TIP1g transgenic roots.

(A) to (C) Fix+ transgenic nodules (Tr Fix+) and Fix+ non-transgenic (Ntr) nodules.

(D) to (F) Fix- transgenic nodules (Tr Fix-) and Fix+ non-transgenic (Ntr) nodules.

All non-transgenic nodules are Fix+. The transgenic roots were selected according to DsRed emission (620/60) (A) and (D); rhizobial *nifH* induction was detected by GFP emission (525/50) (C) and (F) and the composite image were made by using YFP emission 560/40 (B) and (E). Bars:2 mm

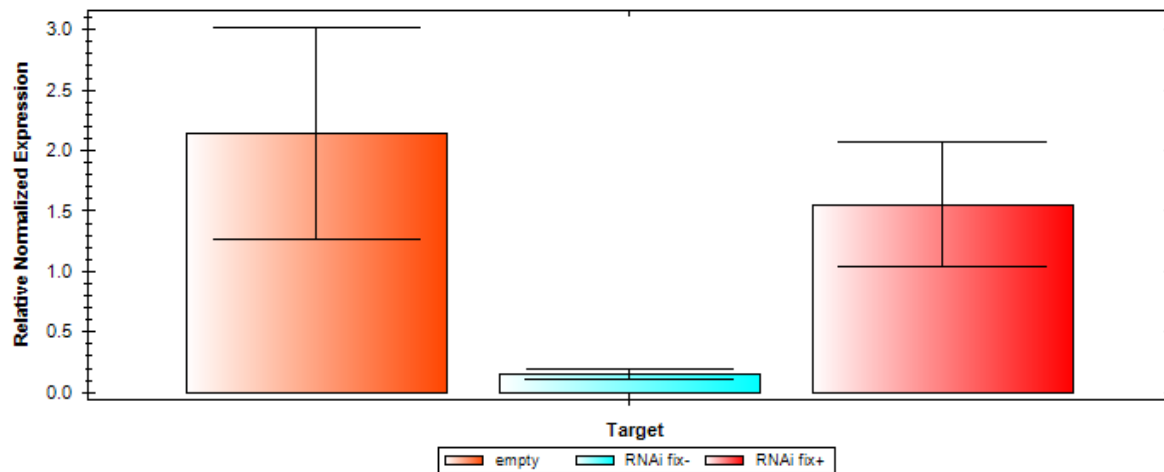

**Supplemental Figure 11.** The level of *TIP1g* gene silencing in  $\text{Fix}^+$  and  $\text{Fix}^-$  nodules harvested from *ProLB:RNAi-TIP1g* transgenic roots in comparison with an empty vector control. The difference between the control and  $\text{Fix}^-$  nodules is significant ( $P < 0.05$ ).

**Supplemental Table 1: primers used for cloning and PCR analysis of *VPS11*, *VPS39* and *TIP* aquaporins**

**Gene specific primers for cloning *VPS11* and *VPS39*:**

*VPS11-F* TCCCCGGGATGTATCAATGGCGGAAGTT;  
*VPS11-R* GGGGTACCTCAGAAG-CCACTGCTAGATGAT;  
*VPS39-F* CGGGATCCATGGTGACAGTGCGTACG;  
*VPS39-R* GGGGTACCTCATCGCTTCCTCAACTGA;

**Promoter specific primers for *VPS11* and *VPS39* :**

*Pro VPS11- F* CACCTATTCAAATTGAAAAACACAGAATATT;  
*Pro VPS11- R* CGCCGCCGCGAT;  
*Pro VPS39- F* CACCAAGGATTCAAACCCCGATCA;  
*Pro VPS39- R* TTTGGTTACGAAATA-TTGAAGTTGA;

**Primers for the analysis of the expression level by q-PCR for *VPS11* and *VPS39* :**

*VPS11- F* TCAAGCAACGCAACTTCCTG;  
*VPS11-R* TCAGGCACAAAGCTGATTGC;  
*Vps39-F* AATCTACTCGCCGGAACAG;  
*Vps39-R* TGACACAACAGGCTTCTTCG;

**Gene specific primers for cloning *TIP1g*:**

*TIP1g-F* CACCATGCCGATTTCTAGAATTGCA;  
*Tip1g-R* TTAATAATCCGTGACAGGTAAGTCTG;

**Promoter specific primers for *TIP1g*:**

*ProTIP1g- F* CACCGCTTGTCTTGATTCATGGATTG;  
*ProTIP1g- R* TGTTTTATATTTTTCTTTTCTCAAAGA;

**Primers for the analysis of the expression level by q-PCR of *TIP* genes in roots and different zones of 14 day old nodules:**

*TIP1a-F* ATTTACGCTGCAAGGGACAC;  
*TIP1a- R* CACATGCAGGGTTGATTGAC;  
*TIP1b-F* CGTTGACCCAAAGAAGGGTA;  
*TIP1b-R* AAGTCCAGCAATTCCACCAC;  
*TIP1c-F* GTCACCTTTGGATTGGCTGT;  
*TIP1c-R* TCAGCTGCTGTGGCATAAAC;  
*TIP1d-F* TTTTGTGTTGCTGGAGTTG;  
*TIP1d-R* ACAGCTGGGTCAAATGTCC;  
*TIP1e-F* CCCAAAGAAAGGAG-CACTTG;  
*TIP1e-R* CCAACCCAATAAACCCAATG;  
*TIP1f-F* GGTTCCATAG-TGGCATGCTT;  
*TIP1f-R* AGCTGCTGTGGCATAACTG;  
*TIP1g-F* AACACCAG-CAGGGTTGGTAG;  
*TIP1g-R* CAAGCAACTGAGCAATCCAA.
